# Supplementary material for: Pupils’ prior knowledge about technological systems: design and validation of a diagnostic tool for primary school teachers
Source: Springer Nature journal article supplement (doi:10.1007/s10798-021-09697-z), 2021-08-20
Supplement: MOESM1 [file 19587354]

## Supplementary material

Pupils' prior knowledge about technological systems: design and validation of a diagnostic tool for primary school teachers.

International Journal of Technology and Design Education

Dannie Wammes<sup>1</sup>, Bert Slof<sup>2</sup>, Willemijn Schot<sup>3</sup> and Liesbeth Kester<sup>2</sup>

1 HAN University of Applied Sciences, Nijmegen.

2 Department of Education, Faculty of Social and Behavioural Sciences, Utrecht University

3 Educational Consultancy & Professional Development, Faculty of Social and Behavioural Sciences, Utrecht University.

Address for correspondence: Dannie Wammes. HAN PABO, Kapittelweg 35, 6525 EN Nijmegen, Netherlands;  
e-mail: [dannie.wammes@han.nl](mailto:dannie.wammes@han.nl).

## Supplementary material 1 Initial scoring rules

| Level                                                                                                                                                                                                                     | Buzz-Wire                                                                                                                                                                                                                   | Stairs Marble Track                                                                                                                                                                                                                                                                                                                        |
|---------------------------------------------------------------------------------------------------------------------------------------------------------------------------------------------------------------------------|-----------------------------------------------------------------------------------------------------------------------------------------------------------------------------------------------------------------------------|--------------------------------------------------------------------------------------------------------------------------------------------------------------------------------------------------------------------------------------------------------------------------------------------------------------------------------------------|
| <b>Single abstractions (Rp4/Sa1)</b>                                                                                                                                                                                      |                                                                                                                                                                                                                             |                                                                                                                                                                                                                                                                                                                                            |
| An abstraction is used to realise the solution. Here only the BW-task needs abstract thinking to realise a correct solution: the proper connection of the loop and spiral as an off/on switch within an electric circuit. |                                                                                                                                                                                                                             |                                                                                                                                                                                                                                                                                                                                            |
| (7) Abs1/Rp4<br>Single<br>abstraction                                                                                                                                                                                     | The correct solution, use of all representations<br><br><i>If not: go to Rp3</i>                                                                                                                                            | Not included.                                                                                                                                                                                                                                                                                                                              |
| <b>Representational system (Rp3)</b>                                                                                                                                                                                      |                                                                                                                                                                                                                             |                                                                                                                                                                                                                                                                                                                                            |
| The relations between all elements of the system are incorporated into the solution.                                                                                                                                      |                                                                                                                                                                                                                             |                                                                                                                                                                                                                                                                                                                                            |
| (6) Rp3<br>Representational<br>system                                                                                                                                                                                     | One element of the correct solution is missing, representation 1 or 2 (see Rp1)<br><br><i>If not: go to Rp2</i>                                                                                                             | Correct solution.                                                                                                                                                                                                                                                                                                                          |
| <b>Representational mappings (Rp2)</b>                                                                                                                                                                                    |                                                                                                                                                                                                                             |                                                                                                                                                                                                                                                                                                                                            |
| Causal relationships with an intermediate step, linking single causal relations.                                                                                                                                          |                                                                                                                                                                                                                             |                                                                                                                                                                                                                                                                                                                                            |
| (5) Rp2<br>Representational<br>mapping                                                                                                                                                                                    | The solution contains the representations 1 and 2 (see Rp1) <i>or</i> there is a circuit in which the lamp and buzzer will function <i>or</i> the spiral and loop will function as a switch<br><br><i>If not: go to Rp1</i> | Combination of two representations.<br>1. Slanted tops upward and in the correct direction (but not all bars at the correct position).<br>2. Bars in the correct position and slanted tops enabling a marble to move to the next bar (but not all slanted tops in the correct direction).                                                  |
| <b>Single representations (Sm4/Rp1)</b>                                                                                                                                                                                   |                                                                                                                                                                                                                             |                                                                                                                                                                                                                                                                                                                                            |
| A single representation (mental coordination of two or more sensory-motor systems) is part of the action. Single causal relationships.                                                                                    |                                                                                                                                                                                                                             |                                                                                                                                                                                                                                                                                                                                            |
| (4) Rp1/Sm4<br>Single<br>representation                                                                                                                                                                                   | All connections are on metal, <i>or</i> the battery is used as a source of pone pole to the other by another part.<br><br><i>If not: go to Sm3</i>                                                                          | Use of one representation.<br>1. Orientation of slanted top prevents marble from rolling sideways <i>or</i><br>2. Bars in the correct order                                                                                                                                                                                                |
| <b>Sensorimotor – system (Sm3)</b>                                                                                                                                                                                        |                                                                                                                                                                                                                             |                                                                                                                                                                                                                                                                                                                                            |
| Observable causal relationships. A manipulation is linked to an observable consequence.                                                                                                                                   |                                                                                                                                                                                                                             |                                                                                                                                                                                                                                                                                                                                            |
| (3) Sm3<br>Sensorimotor<br>system                                                                                                                                                                                         | At least four objects are connected, considering the spiral and loop as different objects.<br><br><i>If not: go to Sm2</i>                                                                                                  | The frame contains at least 5 bars. Within that condition, there are several possibilities.<br>1. The slides are upside down, positioned around the profile of the eccentric wheel.<br>2. Slides are placed upward, but not in the correct order and not preventing a marble to roll-off sideways.<br>3. The bars are skewed in the frame. |
| <b>Sensorimotor mapping (Sm2)</b>                                                                                                                                                                                         |                                                                                                                                                                                                                             |                                                                                                                                                                                                                                                                                                                                            |
| Combining features of two objects.                                                                                                                                                                                        |                                                                                                                                                                                                                             |                                                                                                                                                                                                                                                                                                                                            |
| (2) Sm2<br>Sensorimotor<br>mappings                                                                                                                                                                                       | At least two objects are connected.<br><br><i>If not: go to Sm1</i>                                                                                                                                                         | A combination of two parts (two bars or bar and frame), based on their length or shape.                                                                                                                                                                                                                                                    |
| <b>Sensorimotor actions (Sm1)</b>                                                                                                                                                                                         |                                                                                                                                                                                                                             |                                                                                                                                                                                                                                                                                                                                            |
| Single feature of object or task. Observable.                                                                                                                                                                             |                                                                                                                                                                                                                             |                                                                                                                                                                                                                                                                                                                                            |
| (1) Sm1<br>Sensorimotor<br>actions                                                                                                                                                                                        | Remaining solutions.                                                                                                                                                                                                        | Remaining solutions. For instance, observation or inserting a single bar into the frame.                                                                                                                                                                                                                                                   |

|             |            | Connections |       |        | Conduction |        |        | Circuit |      |        | Wires  |            | System  |           |        |         |
|-------------|------------|-------------|-------|--------|------------|--------|--------|---------|------|--------|--------|------------|---------|-----------|--------|---------|
|             |            | Battery     | Lamp  | Switch | Lamp       | Buzzer | Switch | Battery | Lamp | Buzzer | Switch | Connection | Circuit | Connected | Circle | Circuit |
| Connections | Battery    |             |       |        |            |        |        |         |      |        |        |            |         |           |        |         |
|             | Lamp       | .606        |       |        |            |        |        |         |      |        |        |            |         |           |        |         |
|             | Switch     | .406        | .485  |        |            |        |        |         |      |        |        |            |         |           |        |         |
| Conduction  | Lamp       | .079        | -.061 | .165   |            |        |        |         |      |        |        |            |         |           |        |         |
|             | Buzzer     | .320        | .285  | .174   | -.049      |        |        |         |      |        |        |            |         |           |        |         |
|             | Switch     | .290        | .257  | .275   | .202       | .118   |        |         |      |        |        |            |         |           |        |         |
| Circuit     | Battery    | .527        | .289  | .167   | .122       | .121   | .076   |         |      |        |        |            |         |           |        |         |
|             | Lamp       | .577        | .322  | .159   | .172       | .111   | .066   | .803    |      |        |        |            |         |           |        |         |
|             | Buzzer     | .545        | .212  | .147   | .107       | .087   | .041   | .781    | .687 |        |        |            |         |           |        |         |
|             | Switch     | -.004       | -.157 | .059   | .185       | -.098  | -.169  | .227    | .250 | .242   |        |            |         |           |        |         |
| Wires       | Connection | .591        | .730  | .442   | -.070      | .400   | .272   | .166    | .113 | .104   | -.191  |            |         |           |        |         |
|             | Circuit    | .516        | .289  | .183   | .140       | .112   | -.002  | .651    | .747 | .776   | .333   | .129       |         |           |        |         |
| System      | Connected  | .702        | .795  | .773   | .058       | .376   | .301   | .237    | .284 | .242   | -.087  | .739       | .310    |           |        |         |
|             | Circle     | .627        | .558  | .499   | .152       | .241   | .104   | .731    | .698 | .689   | .226   | .412       | .715    | .412      |        |         |
|             | Circuit    | .502        | .307  | .119   | .092       | .220   | .099   | .667    | .655 | .648   | .133   | .258       | .693    | .258      | .574   |         |

|          |             | Length |       |       |       |       |       | Rotation |       |       |       |       |       | Vertical |       |       |       |       |       | General  |            |
|----------|-------------|--------|-------|-------|-------|-------|-------|----------|-------|-------|-------|-------|-------|----------|-------|-------|-------|-------|-------|----------|------------|
|          |             | Bar 1  | Bar 2 | Bar 3 | Bar 4 | Bar 5 | Bar 6 | Bar 1    | Bar 2 | Bar 3 | Bar 4 | Bar 5 | Bar 6 | Bar 1    | Bar 2 | Bar 3 | Bar 4 | Bar 5 | Bar 6 | Position | Horizontal |
| Length   | Bar 1       |        |       |       |       |       |       |          |       |       |       |       |       |          |       |       |       |       |       |          |            |
|          | Bar 2       | .471   |       |       |       |       |       |          |       |       |       |       |       |          |       |       |       |       |       |          |            |
|          | Bar 3       | .386   | .846  |       |       |       |       |          |       |       |       |       |       |          |       |       |       |       |       |          |            |
|          | Bar 4       | .329   | .614  | .628  |       |       |       |          |       |       |       |       |       |          |       |       |       |       |       |          |            |
|          | Bar 5       | .415   | .710  | .713  | .813  |       |       |          |       |       |       |       |       |          |       |       |       |       |       |          |            |
|          | Bar 6       | .502   | .333  | .395  | .345  | .494  |       |          |       |       |       |       |       |          |       |       |       |       |       |          |            |
| Rotation | Bar 1       | -.124  | .088  | .066  | .164  | .073  | -.059 |          |       |       |       |       |       |          |       |       |       |       |       |          |            |
|          | Bar 2       | -.045  | .145  | .105  | .153  | .096  | -.034 | .756     |       |       |       |       |       |          |       |       |       |       |       |          |            |
|          | Bar 3       | -.129  | .029  | .003  | .060  | .020  | -.029 | .774     | .795  |       |       |       |       |          |       |       |       |       |       |          |            |
|          | Bar 4       | -.018  | .074  | .041  | .080  | .058  | -.026 | .728     | .799  | .759  |       |       |       |          |       |       |       |       |       |          |            |
|          | Bar 5       | -.094  | .036  | .055  | .016  | .000  | -.045 | .690     | .709  | .699  | .722  |       |       |          |       |       |       |       |       |          |            |
|          | Bar 6       | -.034  | .094  | .085  | .130  | .109  | .028  | .599     | .655  | .685  | .619  | .650  |       |          |       |       |       |       |       |          |            |
| Vertical | Bar 1       | .255   | .270  | .183  | .163  | .186  | .206  | -.118    | -.103 | -.143 | -.122 | -.080 | -.055 |          |       |       |       |       |       |          |            |
|          | Bar 2       | .251   | .274  | .201  | .161  | .194  | .227  | -.114    | -.105 | -.128 | -.113 | -.070 | -.050 | .989     |       |       |       |       |       |          |            |
|          | Bar 3       | .249   | .265  | .192  | .156  | .186  | .212  | -.117    | -.103 | -.148 | -.127 | -.074 | -.048 | .989     | .984  |       |       |       |       |          |            |
|          | Bar 4       | .257   | .275  | .198  | .168  | .201  | .227  | -.112    | -.104 | -.143 | -.128 | -.068 | -.055 | .986     | .981  | .981  |       |       |       |          |            |
|          | Bar 5       | .262   | .268  | .187  | .182  | .195  | .214  | -.106    | -.097 | -.137 | -.116 | -.074 | -.043 | .976     | .970  | .976  | .978  |       |       |          |            |
|          | Bar 6       | .272   | .259  | .171  | .175  | .194  | .211  | -.111    | -.096 | -.141 | -.120 | -.073 | -.048 | .973     | .962  | .973  | .976  | .992  |       |          |            |
| General  | Position    | -.151  | -.052 | -.059 | -.109 | -.097 | -.198 | .038     | .033  | .048  | .041  | .024  | .016  | -.115    | -.114 | -.118 | -.113 | -.113 | -.117 |          |            |
|          | Horizontal  | .219   | .040  | .049  | .076  | .043  | .234  | -.045    | -.040 | -.057 | -.049 | -.028 | -.019 | .136     | .135  | .139  | .134  | .134  | .139  | .067     |            |
|          | Combination | .279   | .070  | .082  | .134  | .104  | .319  | -.062    | -.054 | -.078 | -.067 | -.039 | -.025 | .185     | .183  | .190  | .183  | .182  | .189  | -.793    | .390       |

| Sm1 | Sm2 | Sm3 | Rp1a | R1b | Rp2a | Rp1c | Rp1d | Rp2b | RSys1 | RSys2 | Sa1 | t  | y2 | y3  | y4  | y5  |
|-----|-----|-----|------|-----|------|------|------|------|-------|-------|-----|----|----|-----|-----|-----|
| 0   | 0   | 0   | 0    | 0   | 0    | 0    | 0    | 0    | 0     | 0     | 0   | 0  | 0  | 0   | 0   | 0   |
| 1   | 0   | 0   | 0    | 0   | 0    | 0    | 0    | 0    | 0     | 0     | 0   | 1  | 0  | 0   | 0   | 0   |
| 1   | 1   | 0   | 0    | 0   | 0    | 0    | 0    | 0    | 0     | 0     | 0   | 2  | 1  | 0   | 0   | 0   |
| 1   | 1   | 0   | 1    | 0   | 0    | 0    | 0    | 0    | 0     | 0     | 0   | 3  | 3  | 1   | 0   | 0   |
| 1   | 1   | 0   | 1    | 0   | 0    | 1    | 0    | 0    | 0     | 0     | 0   | 4  | 6  | 4   | 1   | 0   |
| 1   | 1   | 0   | 1    | 1   | 0    | 0    | 0    | 0    | 0     | 0     | 0   | 4  | 6  | 4   | 1   | 0   |
| 1   | 1   | 0   | 1    | 1   | 1    | 0    | 0    | 0    | 0     | 0     | 0   | 5  | 10 | 10  | 5   | 1   |
| 1   | 1   | 0   | 1    | 1   | 1    | 1    | 0    | 0    | 1     | 0     | 0   | 7  | 21 | 35  | 35  | 21  |
| 1   | 1   | 1   | 0    | 0   | 0    | 0    | 0    | 0    | 0     | 0     | 0   | 3  | 3  | 1   | 0   | 0   |
| 1   | 1   | 1   | 0    | 0   | 0    | 0    | 1    | 0    | 0     | 0     | 0   | 4  | 6  | 4   | 1   | 0   |
| 1   | 1   | 1   | 0    | 0   | 0    | 1    | 0    | 0    | 0     | 0     | 0   | 4  | 6  | 4   | 1   | 0   |
| 1   | 1   | 1   | 0    | 1   | 0    | 0    | 0    | 0    | 0     | 0     | 0   | 4  | 6  | 4   | 1   | 0   |
| 1   | 1   | 1   | 0    | 1   | 0    | 1    | 0    | 0    | 0     | 0     | 0   | 5  | 10 | 10  | 5   | 1   |
| 1   | 1   | 1   | 1    | 0   | 0    | 0    | 0    | 0    | 0     | 0     | 0   | 4  | 6  | 4   | 1   | 0   |
| 1   | 1   | 1   | 1    | 0   | 0    | 0    | 1    | 0    | 0     | 0     | 0   | 5  | 10 | 10  | 5   | 1   |
| 1   | 1   | 1   | 1    | 0   | 0    | 1    | 0    | 0    | 0     | 0     | 0   | 5  | 10 | 10  | 5   | 1   |
| 1   | 1   | 1   | 1    | 0   | 0    | 1    | 1    | 1    | 0     | 0     | 0   | 7  | 21 | 35  | 35  | 21  |
| 1   | 1   | 1   | 1    | 0   | 0    | 1    | 1    | 1    | 0     | 1     | 0   | 8  | 28 | 56  | 70  | 56  |
| 1   | 1   | 1   | 1    | 1   | 0    | 0    | 0    | 0    | 0     | 0     | 0   | 5  | 10 | 10  | 5   | 1   |
| 1   | 1   | 1   | 1    | 1   | 0    | 0    | 1    | 0    | 0     | 0     | 0   | 6  | 15 | 20  | 15  | 6   |
| 1   | 1   | 1   | 1    | 1   | 0    | 1    | 0    | 0    | 0     | 0     | 0   | 6  | 15 | 20  | 15  | 6   |
| 1   | 1   | 1   | 1    | 1   | 0    | 1    | 1    | 1    | 0     | 0     | 0   | 8  | 28 | 56  | 70  | 56  |
| 1   | 1   | 1   | 1    | 1   | 1    | 0    | 0    | 0    | 0     | 0     | 0   | 6  | 15 | 20  | 15  | 6   |
| 1   | 1   | 1   | 1    | 1   | 1    | 0    | 1    | 0    | 0     | 0     | 0   | 7  | 21 | 35  | 35  | 21  |
| 1   | 1   | 1   | 1    | 1   | 1    | 0    | 1    | 0    | 0     | 1     | 0   | 8  | 28 | 56  | 70  | 56  |
| 1   | 1   | 1   | 1    | 1   | 1    | 1    | 0    | 0    | 1     | 0     | 0   | 8  | 28 | 56  | 70  | 56  |
| 1   | 1   | 1   | 1    | 1   | 1    | 1    | 1    | 1    | 1     | 1     | 1   | 12 | 66 | 220 | 495 | 792 |

## Variables

Sm1 Wire connected (Sm1)

Sm2 Components connected (Sm2)

Sm3 All components connected

Rp1a Poles of battery connected by component

Rp1b Both poles of lamp .AND. buzzer connected to battery

Rp2a Lamp .OR. buzzer in circuit

Rp1c All connections on metal

Rp1d Ring and spiral linked by other component

Rp2b Rp1c .AND. Rp 1d

Sys1 Rp1a .AND. Rp1b .AND. Rp1c

Sys2 Ring and spiral connected as switch

Abs1 Sys1.AND. Sys 2

| Sm1 | Sm2a | Sm2b | Sm3a | Sm3b | Sm3c | Rp1a | Rp1b | Rp1c | Rp2a | Rp1d | Rp2b | Rp3 | t  | y2  | y3  | y4 |
|-----|------|------|------|------|------|------|------|------|------|------|------|-----|----|-----|-----|----|
| 0   | 0    | 0    | 0    | 0    | 0    | 0    | 0    | 0    | 0    | 0    | 0    | 0   | 0  | 0   | 0   | 0  |
| 1   | 0    | 0    | 0    | 0    | 0    | 0    | 0    | 0    | 0    | 0    | 0    | 0   | 0  | 0   | 0   | 1  |
| 1   | 1    | 0    | 0    | 0    | 0    | 0    | 0    | 0    | 0    | 0    | 0    | 0   | 1  | 0   | 0   | 1  |
| 1   | 1    | 1    | 0    | 0    | 0    | 0    | 0    | 0    | 0    | 0    | 0    | 0   | 3  | 1   | 0   | 1  |
| 1   | 1    | 1    | 0    | 1    | 0    | 0    | 0    | 0    | 0    | 0    | 0    | 0   | 6  | 4   | 1   | 1  |
| 1   | 1    | 1    | 1    | 0    | 0    | 0    | 0    | 0    | 0    | 0    | 0    | 0   | 6  | 4   | 1   | 1  |
| 1   | 1    | 1    | 1    | 0    | 0    | 0    | 1    | 0    | 0    | 0    | 0    | 0   | 10 | 10  | 5   | 1  |
| 1   | 1    | 1    | 1    | 0    | 1    | 1    | 0    | 0    | 0    | 0    | 0    | 0   | 15 | 20  | 15  | 1  |
| 1   | 1    | 1    | 1    | 0    | 1    | 1    | 1    | 0    | 0    | 0    | 0    | 0   | 21 | 35  | 35  | 1  |
| 1   | 1    | 1    | 1    | 0    | 1    | 1    | 1    | 0    | 0    | 1    | 0    | 0   | 28 | 56  | 70  | 1  |
| 1   | 1    | 1    | 1    | 1    | 0    | 0    | 0    | 0    | 0    | 0    | 0    | 0   | 10 | 10  | 5   | 1  |
| 1   | 1    | 1    | 1    | 1    | 0    | 0    | 1    | 1    | 0    | 0    | 0    | 0   | 21 | 35  | 35  | 1  |
| 1   | 1    | 1    | 1    | 1    | 1    | 0    | 0    | 0    | 0    | 0    | 0    | 0   | 15 | 20  | 15  | 1  |
| 1   | 1    | 1    | 1    | 1    | 1    | 0    | 1    | 1    | 0    | 0    | 0    | 0   | 28 | 56  | 70  | 1  |
| 1   | 1    | 1    | 1    | 1    | 1    | 1    | 0    | 0    | 0    | 0    | 0    | 0   | 21 | 35  | 35  | 1  |
| 1   | 1    | 1    | 1    | 1    | 1    | 1    | 0    | 0    | 0    | 1    | 0    | 0   | 28 | 56  | 70  | 1  |
| 1   | 1    | 1    | 1    | 1    | 1    | 1    | 0    | 0    | 0    | 1    | 1    | 0   | 36 | 84  | 126 | 1  |
| 1   | 1    | 1    | 1    | 1    | 1    | 1    | 1    | 1    | 1    | 0    | 0    | 0   | 45 | 120 | 210 | 1  |
| 1   | 1    | 1    | 1    | 1    | 1    | 1    | 1    | 1    | 1    | 1    | 0    | 0   | 55 | 165 | 330 | 1  |
| 1   | 1    | 1    | 1    | 1    | 1    | 1    | 1    | 1    | 1    | 1    | 1    | 1   | 78 | 286 | 715 | 1  |

## Variables

Sm1 Any action

Sm2a Any combination of bars

Sm2b Any combination of bar and frame

Sm3a Vertical position bar in frame

Sm3b Frame filled

Sm3c Slanted top upward

Rp1a Slanted top aligned

Rp1b Bars at correct position

Rp1c All bars at correct position

Rp2a Slanted top of  $\geq 5$  bars guide marble

Rp1d Slanted top correct position

Rp2b Slanted top of  $\geq 5$  bars correct position

Rp3 Correct configuration
